# Supplementary material
Source: publisher figshare collection journal article supplement (https://gsapubs.figshare.com/ndownloader/files/23308316)
Supplement: Supplementary file 1 [file 23308316]

# Sulfur isotopes of host strata for Howards Pass (Yukon-Northwest Territories) Zn-Pb deposits implicate anaerobic oxidation of methane not basin stagnation

Craig A. Johnson<sup>1</sup>, John F. Slack<sup>2</sup>, Julie A. Dumoulin<sup>3</sup>, Karen D. Kelley<sup>1</sup>, and Hendrik Falck<sup>4</sup>

<sup>1</sup>*U.S. Geological Survey, P.O. Box 25046, Denver, Colorado 80225, USA*

<sup>2</sup>*U.S. Geological Survey (Emeritus), National Center, MS 954, Reston, Virginia 20192, USA*

<sup>3</sup>*U.S. Geological Survey, Alaska Science Center, Anchorage, Alaska 99508, USA*

<sup>4</sup>*Northwest Territories Geological Survey, P.O. Box 1320, Yellowknife, NT X1A 2L9, Canada*

## METHODS

Mudstones were sampled from drill holes XYC-116 in the core of the XY Central zone and XYC-167 in the southeast margin of the zone (see Slack et al., 2017). Additional samples were obtained from drill hole cores in the XY Central (XYC-115), Don (D-197), and Don East (DNE-106) zones. Core pieces weighing a few tens of grams to a few hundred grams were powdered in a ceramic mortar and pestle for chemical, S isotope, and C isotope analysis. Five concretions were sampled by microdrilling of pyrite or calcite, and were analyzed only for S and C isotopes. Iron, Zn, Pb, Al, and organic carbon (C<sub>org</sub>) concentrations were determined by Activation Laboratories, Ltd., Acton, Ontario. Metal concentrations were determined by inductively-coupled plasma mass spectrometry after fusing the powders with lithium metaborate/tetraborate flux and dissolving the resulting glasses in acid. Organic C was determined by induction-furnace infrared analyzer after acid removal of carbonate carbon. Pyrite S was extracted from aliquots of powder weighing 0.2 g by the chromium chloride method

(Canfield et al., 1986). The S yield, which was obtained by weighing the end product  $\text{Ag}_2\text{S}$ , was used to calculate the concentration of pyrite S. The  $\text{Ag}_2\text{S}$  was then analyzed by elemental analyzer-isotope ratio mass spectrometry (EA-IRMS) to obtain the sulfur isotope composition of total pyrite (Johnson et al., 2018). The EA-IRMS was calibrated by analyzing the IAEA-S-3 and NBS 123 standards, the accepted compositions for which were taken from Brand et al. (2014). Carbonate C isotopes were analyzed by phosphoric acid digestion using either septum-capped vials in an autosampler or stopcock-sealed reaction vessels (McCrea, 1950). Metallic Ag was suspended in the vessels to eliminate any  $\text{H}_2\text{S}$  from pyrite decomposition. The procedures were calibrated by analyzing the NBS 18 and NBS 19 calcite standards (accepted compositions from Brand et al., 2014) or in-house calcite standards that had been calibrated against NBS 18 and NBS 19. Isotopic results are expressed as  $\delta$ -values where  $\delta^{34}\text{S}$  (in per mil, ‰) =  $((^{34}\text{S}/^{32}\text{S}_{\text{sample}}/^{34}\text{S}/^{32}\text{S}_{\text{VCDT}}) - 1) \times 1,000$ , and  $\delta^{13}\text{C}$  (in per mil, ‰) =  $((^{13}\text{C}/^{12}\text{C}_{\text{sample}}/^{13}\text{C}/^{12}\text{C}_{\text{VPDB}}) - 1) \times 1,000$ . Duplicate analyses generally agreed to within  $\pm 0.2$  ‰ for  $\delta^{34}\text{S}$  and within  $\pm 0.1$  ‰ for  $\delta^{13}\text{C}$ .

## REFERENCES CITED

- Brand, W.A., Coplen, T.B., Vogl, J., Rosner, M., and Prohaska, T., 2014, Assessment of international reference materials for isotope-ratio analysis (IUPAC Technical Report): Pure and Applied Chemistry, v. 86, p. 425–467, <https://doi:10.1515/pac-2013-1023>.
- Canfield, D.E., Raiswell, R., Westrich, J.T., Reaves, C.M., and Berner, R.A., 1986, The use of chromium reduction in the analysis of reduced inorganic sulfur in sediments and shales: Chemical Geology, v. 54, p. 149–155, doi:10.1016/0009-2541(86)90078-1.

- Johnson, C.A., Stricker, C.A., Gulbransen, C.A., and Emmons, M.P., 2018, Determination of  $\delta^{13}\text{C}$ ,  $\delta^{15}\text{N}$ , or  $\delta^{34}\text{S}$  by isotope-ratio-monitoring mass spectrometry using an elemental analyzer: U.S. Geological Survey Techniques and Methods, 5-D4, <https://doi:10.3133/tm5D4>.
- Lyons, T.W., and Severmann, S., 2006, A critical look at iron paleoredox proxies: new insights from modern euxinic marine basins: *Geochimica et Cosmochimica Acta*, v. 70, p. 5698–5722, <https://doi:10.1016/j.gca.2006.08.021>.
- McCrea, J.M., 1950, On the isotope chemistry of carbonates and a paleotemperature scale: *Journal of Chemical Physics*, v. 18, p. 849–857.
- Scott, C., and Lyons, T.W., 2012, Contrasting molybdenum cycling and isotopic properties in euxinic versus non-euxinic sediments and sedimentary rocks: refining the paleoproxies: *Chemical Geology*, v. 324–325, p. 19–27, <https://doi:10.1016/j.chemgeo.2012.05.012>.
- Slack, J.F., Falck, H., Kelley, K.D., and Xue, G.G., 2017, Geochemistry of host rocks in the Howards Pass district, Yukon-Northwest Territories, Canada: implications for sedimentary environments of Zn-Pb and phosphate mineralization: *Mineralium Deposita*, v. 52, p. 565–593, <https://doi:10.1007/s00126-016-0680-x>.

## FIGURE CAPTION

Figure DR1. Plots showing relationships among redox proxies for the Duo Lake Formation: A, concentration of Mo versus degree of pyritization of total Fe ( $\text{DOP}_T = \text{pyrite-Fe}/\text{total-Fe}$ ); B, concentration of Mo versus Fe/Al; and C; Fe/Al versus  $\text{DOP}_T$ . Mo > 25 ppm is normally considered diagnostic of at least intermittent euxinia; higher Fe/Al and  $\text{DOP}_T$  are normally

67 considered diagnostic of more reducing conditions culminating in euxinia (Scott and Lyons,  
68 2012; Lyons and Severmann; 2006). Data presented in Table DR1.

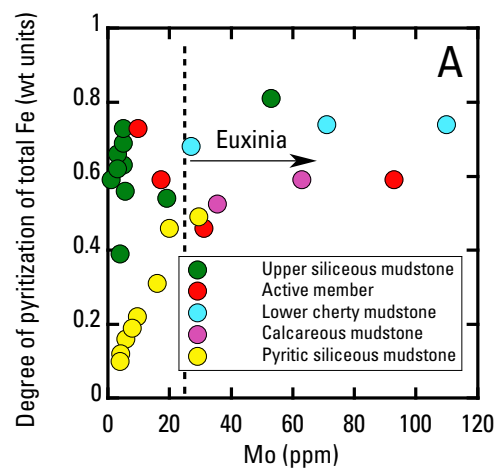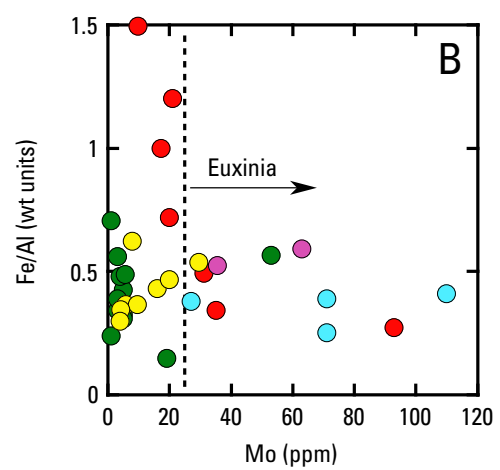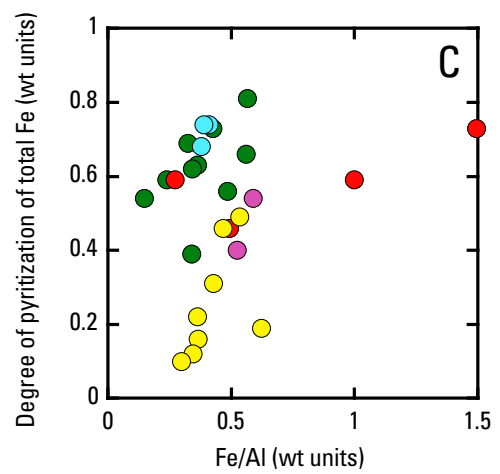

Table DR1. Isotopic and chemical data for samples of Duo Lake Formation.

| Sample*          | Member † | Lithology                    | Pyrite S (%) | Organic C (%) | δ34S-pyrite (‰) | δ13C-carbonate (‰) | Fe (%) | Al (%) | Mo (ppm) | Zn (ppm) | Pb (ppm) | DOP-total§ |
|------------------|----------|------------------------------|--------------|---------------|-----------------|--------------------|--------|--------|----------|----------|----------|------------|
| XYC-116-202.3    | usm      | mudstone                     | 1.94         | 5.86          | 11.8            |                    | 2.67   | 7.37   | 5        | 19       | 36       | 0.63       |
| XYC-116-204.2    | usm      | phosphatic mudstone          | 0.56         | 6.44          | 30.6            |                    | 1.24   | 3.66   | 4        | 9        | 21       | 0.39       |
| XYC-116-206.9    | usm      | phosphatic mudstone          | 0.80         | 6.74          | 29.5            |                    | 1.18   | 4.96   | <2       | 10       | 10       | 0.59       |
| XYC-116-212.5    | usm      | phosphatic mudstone          | 1.40         | 7.32          | 33.1            | -6.5               | 1.84   | 3.28   | 3        | 12       | 44       | 0.66       |
| XYC-116-220.5    | usm      | phosphatic mudstone          | 1.16         | 8.23          | 29.6            |                    | 1.46   | 4.49   | 5        | 64       | 89       | 0.69       |
| XYC-116-225.0    | usm      | phosphatic mudstone          | 1.34         | 10.05         | 38.4            |                    | 1.61   | 3.79   | 5        | 780      | 59       | 0.72       |
| XYC-116-225.5    | usm      | phosphatic mudstone          | 1.84         | 7.55          | 32.3            |                    | 1.24   | 2.59   | 4        | 18100    | 52       |            |
| XYC-116-234.5    | usm      | mudstone                     | 0.72         | 6.74          | 22.2            |                    | 1.00   | 2.93   | 3        | 82       | 18       | 0.63       |
| XYC-116-266.2    | usm      | mudstone                     | 0.78         | 6.97          | 21.1            |                    | 0.67   | 1.72   | 3        | 6720     | 72       |            |
| XYC-116-286.3    | usm      | siliceous mudstone           | 0.21         | 1.12          | 27.7            |                    | 0.26   | 0.37   | <2       | 2170     | 76       |            |
| XYC-116-288.0    | usm      | siliceous mudstone           | 0.29         | 7.39          | 22.2            |                    | 0.33   | 1.07   | 5        | 1270     | 96       |            |
| XYC-116-290.0    | usm      | mudstone                     | 1.36         | 5.74          | 18.3            | -4.2               | 1.46   | 2.58   | 53       | 20       | 135      | 0.81       |
| XYC-116-300.5    | usm      | limestone                    |              |               | 25.2            | -4.4               |        |        |          |          |          |            |
| XYC-116-304.8    | usm      | siliceous mudstone           | 0.15         | 6.01          | 13.9            |                    | 0.24   | 1.63   | 19       | 136      | 67       | 0.54       |
| XYC-116-316.2**  | usm      | siliceous mudstone           | 0.34         | 6.14          | 22.1            |                    | 0.54   | 1.11   | 5.50     | 919      | 68.1     | 0.55       |
| XYC-116-323.8**  | am       | mudstone                     | 0.53         | 7.88          | -0.6            | -4.8               | 0.78   | 0.78   | 17.2     | 296      | 186      | 0.59       |
| XYC-116-325.4    | am       | siliceous mudstone           | 1.18         | 6.68          | 13.1            |                    | 1.10   | 1.63   | 21       | 21300    | 3600     |            |
| XYC-116-326.2**  | am       | highly carbonaceous mudstone | 0.50         | 16.48         | -3.9            |                    | 0.73   | 2.69   | 92.8     | 296      | 250      | 0.59       |
| XYC-116-326.8    | am       | mudstone                     | 0.61         | 7.98          | 7.0             |                    | 0.40   | 1.17   | 35       | 8240     | 1690     |            |
| XYC-116-334.2**  | am       | siliceous mudstone           | 1.32         | 2.37          | 15.3            | -3.5               | 1.57   | 1.05   | 9.81     | 668      | 330      | 0.73       |
| XYC-116-350.1    | am       | mudstone                     | 0.78         | 6.16          | 12.1            | -3.7               | 0.87   | 1.21   | 20       | 75       | 2320     | 0.78       |
| XYC-116-357.6**  | am       | mudstone                     | 0.36         | 6.73          | -5.2            |                    | 0.66   | 1.34   | 31.2     | 25.5     | 174      | 0.47       |
| XYC-116-364.7    | lcm      | limestone                    |              |               | 16.4            | -3.9               |        |        |          |          |          |            |
| XYC-116-365.0    | lcm      | limestone                    |              |               | 17.2            | -6.3               |        |        |          |          |          |            |
| XYC-116-365.7    | lcm      | limestone                    |              |               | 20.0            | -11.7              |        |        |          |          |          |            |
| XYC-116-370.3    | lcm      | siliceous mudstone           | 0.27         | 8.22          | 14.6            |                    | 0.28   | 1.11   | 71       | 2670     | 160      |            |
| XYC-116-376.5    | lcm      | highly carbonaceous mudstone | 1.73         | 13.20         | 5.6             | -3.4               | 2.02   | 4.92   | 110      | 115      | 253      | 0.75       |
| XYC-116-380.3    | lcm      | mudstone                     | 1.30         | 8.31          | 4.3             |                    | 1.66   | 4.38   | 27       | 12       | 46       | 0.68       |
| XYC-116-393.2    | lcm      | mudstone                     | 1.21         | 7.81          | 4.3             |                    | 1.42   | 3.64   | 71       | 285      | 65       | 0.74       |
| XYC-167-281.0**  | ccm      | mudstone                     | 1.97         | 3.40          | -5.7            | -4.1               | 3.20   | 5.43   | 63.0     | 20.2     | 27.3     | 0.54       |
| XYC-167-285.5**  | ccm      | mudstone                     | 1.23         | 2.54          | -6.3            | -4.2               | 2.68   | 5.11   | 35.6     | 351      | 19.3     | 0.40       |
| XYC-167-300.0**  | psm      | mudstone                     | 1.78         | 1.45          | -5.6            | -4.1               | 3.19   | 5.95   | 29.6     | 20.3     | 35.7     | 0.49       |
| XYC-167-310.5**  | psm      | dolomitic mudstone           | 1.02         | 1.32          | -8.4            | -3.9               | 2.87   | 6.69   | 16.0     | 13.8     | 23.4     | 0.31       |
| XYC-167-318.1**  | psm      | mudstone                     | 1.57         | 1.34          | -5.5            | -4.1               | 2.97   | 6.36   | 19.9     | 11.8     | 34.4     | 0.46       |
| XYC-167-328.9**  | psm      | dolomitic mudstone           | 0.32         | 0.64          | -5.1            | -3.5               | 1.76   | 4.81   | 5.82     | 15.1     | 7.47     | 0.16       |
| XYC-167-337.2**  | psm      | dolomitic mudstone           | 0.49         | 0.75          | -8.6            | -3.7               | 1.92   | 5.27   | 9.60     | 89.4     | 6.9      | 0.22       |
| XYC-167-345.7**  | psm      | dolomitic mudstone           | 0.24         | 0.54          | -7.8            | -3.5               | 1.78   | 5.17   | 4.22     | 39.8     | 9.56     | 0.12       |
| XYC-167-358.1**  | psm      | dolomitic mudstone           | 0.54         | 0.59          | -16.0           | -3.6               | 2.47   | 3.96   | 7.85     | 24.4     | 14.6     | 0.19       |
| XYC-167-363.6**  | psm      | mudstone                     | 0.17         | 0.98          | -15.4           | -3.7               | 1.56   | 5.22   | 3.82     | 287      | 7.47     | 0.09       |
| XYC-115-61.0     | usm      | limestone                    |              |               |                 | -2.5               |        |        |          |          |          |            |
| XYC-115-72.9     | usm      | limestone                    |              |               | -1.0            | -3.8               |        |        |          |          |          |            |
| D197-410 † †     | usm      | concretion                   |              |               | 34.5            | -12.2              |        |        |          |          |          |            |
| D197-432.2A † †  | usm      | concretion                   |              |               |                 | -9.8               |        |        |          |          |          |            |
| D197-432.2B † †  | usm      | concretion                   |              |               | 27.9            | -10.1              |        |        |          |          |          |            |
| D197-612.85 † †  | ccm      | concretion                   |              |               | 13.0            |                    |        |        |          |          |          |            |
| DNE106-280.9 † † | usm      | concretion                   |              |               | 26.5            | -8.7               |        |        |          |          |          |            |

\* Sample numbers consist of zone (XYC = XY Central, D = Don, DNE = Don East), drill hole number, and depth, in meters.

† usm = upper siliceous mudstone, am = active member, lcm = lower cherty mudstone, ccm = calcareous mudstone, psm = pyritic siliceous mudstone.

§ DOP-total = pyrite Fe/total Fe, where pyrite Fe = 0.861 \* pyrite S. No value given where Zn or Pb exceed 1,000 ppm due to possible bias from sphalerite or galena contributions to pyrite S.

\*\*Analyses of same powders analyzed by Slack et al. (2017). Values for Fe, Mo, Zn, Pb, and organic C are from those authors. For other samples, new pieces of core were powdered for isotopic and chemical analysis.

† † Powders obtained using a dental drill.
